# Supplementary material for: A new 3D Ag(i)-based high-energy metal organic frameworks (HE-MOFs): synthesis, crystal structure and explosive performance
Source: Royal Society of Chemistry journal article supplement (doi:10.1039/d0nj05744d), 2021-01-01
Supplement: d0nj05744d1.pdf [file d0nj05744d1.pdf]

# **A novel 3D energetic MOF of high energy content: synthesis and explosive performance of a silver nitrate compound with 4,4',5,5'-tetraamine-3,3'-bis(1,2,4-triazole)**

Jiaping Zhu,<sup>a</sup> Jielai Xu,<sup>a</sup> Chaojian Yao,<sup>a</sup> Tong Zhan,<sup>b, c</sup> Weibing Liu,<sup>a</sup> and Hua Tan<sup>\*, a</sup>

a. College of Chemistry, Guangdong University of Petrochemical Technology, Maoming 525000, P. R. China \* Email address: huatan@gdupt.edu.cn

b. College of Environmental Science and engineering, Guangdong University of Petrochemical Technology, Maoming 525000, P. R. China

c. Guangdong Provincial Key Laboratory of Petrochemical Pollution Process and Control, Guangdong University of Petrochemical Technology, Maoming 525000, P. R. China

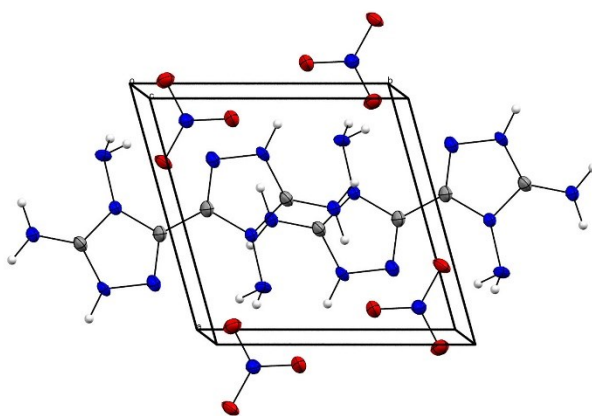

**Fig. S1** Packing structure of  $H_2(TABT)(NO_3)_2$

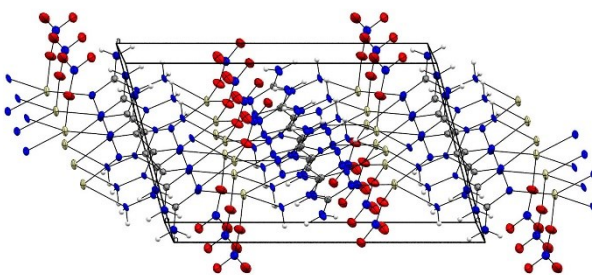

**Fig. S2** Packing structure of  $\{Ag_2(TABT)(NO_3)_2\}_n$

**Table S1.** Crystal properties of H<sub>2</sub>TABT(NO<sub>3</sub>)<sub>2</sub> and Ag<sub>2</sub>(TABT)(NO<sub>3</sub>)<sub>2</sub>

| Compound                                                                            | H <sub>2</sub> TABT(NO <sub>3</sub> ) <sub>2</sub>              | Ag <sub>2</sub> (TABT)(NO <sub>3</sub> ) <sub>2</sub>         |
|-------------------------------------------------------------------------------------|-----------------------------------------------------------------|---------------------------------------------------------------|
| Formula                                                                             | C <sub>4</sub> H <sub>10</sub> N <sub>12</sub> O <sub>6</sub>   | C <sub>2</sub> H <sub>4</sub> AgN <sub>6</sub> O <sub>3</sub> |
| Mw /g mol <sup>-1</sup>                                                             | 322.24                                                          | 267.98                                                        |
| Crystal system                                                                      | Triclinic                                                       | Monoclinic                                                    |
| Crystal group                                                                       | <i>P</i> -1                                                     | <i>P</i> 2 <sub>1</sub> / <i>c</i>                            |
| <i>a</i> / Å                                                                        | 6.672(2)                                                        | 8.9723(14)                                                    |
| <i>b</i> / Å                                                                        | 6.9096(18)                                                      | 5.0146(8)                                                     |
| <i>c</i> / Å                                                                        | 6.992(2)                                                        | 14.813(2)                                                     |
| $\alpha$ /°                                                                         | 73.521(12)                                                      | 90                                                            |
| $\beta$ /°                                                                          | 89.005(3)                                                       | 105.854(2)                                                    |
| $\gamma$ /°                                                                         | 75.832(5)                                                       | 90                                                            |
| <i>v</i> / Å <sup>3</sup>                                                           | 299.22(15)                                                      | 641.14(17)                                                    |
| <i>z</i>                                                                            | 1                                                               | 4                                                             |
| $\rho_{\text{calc.}}$ /g cm <sup>-3</sup>                                           | 1.788                                                           | 2.776                                                         |
| $\mu$ mm <sup>-1</sup>                                                              | 0.161                                                           | 3.120                                                         |
| <i>F</i> (000)                                                                      | 166                                                             | 516.0                                                         |
| 2 $\theta$ range /°                                                                 | 6.086-55.352                                                    | 5.718-55.112                                                  |
| $\lambda$ (MoK $\alpha$ )/Å                                                         | 0.71073                                                         | 0.71073                                                       |
| Temp. /K                                                                            | 100.15                                                          | 100.15                                                        |
| Refl. collected                                                                     | 1823                                                            | 3651                                                          |
| Refl. unique                                                                        | 1311                                                            | 1467                                                          |
| <i>R</i> (int)                                                                      | 0.0138                                                          | 0.0144                                                        |
| Data /rest. /param.                                                                 | 1311/0/101                                                      | 1467/0/109                                                    |
| GOOF                                                                                | 1.132                                                           | 1.077                                                         |
| <i>R</i> <sub>1</sub> , <i>wR</i> <sub>2</sub> [ <i>I</i> >2 $\sigma$ ( <i>I</i> )] | <i>R</i> <sub>1</sub> = 0.0433, <i>wR</i> <sub>2</sub> = 0.1001 | <i>R</i> <sub>1</sub> =0.0183, <i>wR</i> <sub>2</sub> =0.0402 |
| <i>R</i> <sub>1</sub> , <i>wR</i> <sub>2</sub> (all data)                           | <i>R</i> <sub>1</sub> = 0.0550, <i>wR</i> <sub>2</sub> = 0.1042 | <i>R</i> <sub>1</sub> =0.0233, <i>wR</i> <sub>2</sub> =0.0423 |
| Index range                                                                         | -8≤ <i>h</i> ≤7, -9≤ <i>k</i> ≤7, -8≤ <i>l</i> ≤8               | -11≤ <i>h</i> ≤9, -5≤ <i>k</i> ≤6, -18≤ <i>l</i> ≤19          |
| Largest diff. peak/hole /e Å <sup>-3</sup>                                          | 0.32/-0.32                                                      | 0.43/-0.37                                                    |
| CCDC                                                                                | 2025060                                                         | 2025062                                                       |

**Table S2.** Bond length of  $\text{H}_2(\text{TABT})(\text{NO}_3)_2$  and  $\text{Ag}_2(\text{TABT})(\text{NO}_3)_2$ 

|                                           | Atom          | Length/Å   | Atom        | Length/Å |
|-------------------------------------------|---------------|------------|-------------|----------|
| $\text{H}_2(\text{TABT})(\text{NO}_3)_2$  | N(1)–N(2)     | 1.375(2)   | N(5)–C(2)   | 1.355(2) |
|                                           | N(1)–C(1)     | 1.304(3)   | C(1)–C(1)#1 | 1.454(4) |
|                                           | N(2)–C(2)     | 1.332(2)   | O(1)–N(6)   | 1.266(2) |
|                                           | N(3)–C(2)     | 1.319(3)   | O(2)–N(6)   | 1.240(2) |
|                                           | N(4)–N(5)     | 1.405(2)   | O(3)–N(6)   | 1.257(2) |
|                                           | N(5)–C(1)     | 1.384(2)   |             |          |
| $\text{Ag}_2(\text{TABT})(\text{NO}_3)_2$ | Ag(1)–Ag(1)#1 | 3.3374(4)  | N(2)–N(4)   | 1.407(2) |
|                                           | Ag(1)–Ag(1)#2 | 3.3374(4)  | N(2)–C(1)   | 1.366(3) |
|                                           | Ag(1)–O(2)    | 2.5772(17) | N(2)–C(2)   | 1.373(3) |
|                                           | Ag(1)–N(4)#3  | 2.4612(19) | N(3)–C(1)   | 1.328(3) |
|                                           | Ag(1)–N(5)    | 2.1905(19) | N(5)–N(6)   | 1.400(3) |
|                                           | Ag(1)–N(6)#1  | 2.2738(18) | N(5)–C(1)   | 1.331(3) |
|                                           | O(1)–N(1)     | 1.250(3)   | N(6)–C(2)   | 1.311(3) |
|                                           | O(2)–N(1)     | 1.262(3)   | C(2)–C(2)#2 | 1.455(5) |
|                                           | O(3)–N(1)     | 1.253(3)   |             |          |

**Table S3.** Bond angle of  $\text{H}_2(\text{TABT})(\text{NO}_3)_2$  and  $\text{Ag}_2(\text{TABT})(\text{NO}_3)_2$ 

|                                           | Atom                  | Angle/°    | Atom              | Angle/°    |
|-------------------------------------------|-----------------------|------------|-------------------|------------|
| $\text{H}_2(\text{TABT})(\text{NO}_3)_2$  | C(1)–N(1)–N(2)        | 104.25(15) | N(5)–C(1)–C(1)#1  | 124.1(2)   |
|                                           | C(2)–N(2)–N(1)        | 111.93(15) | N(2)–C(2)–N(5)    | 106.05(16) |
|                                           | C(1)–N(5)–N(4)        | 132.68(15) | N(3)–C(2)–N(2)    | 128.91(17) |
|                                           | C(2)–N(5)–N(4)        | 120.81(15) | N(3)–C(2)–N(5)    | 125.04(17) |
|                                           | C(2)–N(5)–C(1)        | 106.45(15) | O(2)–N(6)–O(1)    | 119.67(15) |
|                                           | N(1)–C(1)–N(5)        | 111.31(16) | O(2)–N(6)–O(3)    | 121.10(16) |
|                                           | N(1)–C(1)–C(1)#1      | 124.6(2)   | O(3)–N(6)–O(1)    | 119.22(15) |
| $\text{Ag}_2(\text{TABT})(\text{NO}_3)_2$ | Ag(1)#1–Ag(1)–Ag(1)#2 | 97.401(15) | O(3)–N(1)–O(2)    | 119.4(2)   |
|                                           | O(2)–Ag(1)–Ag(1)#2    | 157.97(4)  | C(1)–N(2)–N(4)    | 125.94(19) |
|                                           | O(2)–Ag(1)–Ag(1)#1    | 68.68(4)   | C(1)–N(2)–C(2)    | 106.93(18) |
|                                           | N(4)#3–Ag(1)–Ag(1)#1  | 139.53(4)  | C(2)–N(2)–N(4)    | 127.09(18) |
|                                           | N(4)#3–Ag(1)–Ag(1)#2  | 89.63(5)   | N(2)–N(4)–Ag(1)#4 | 127.28(14) |
|                                           | N(4)#3–Ag(1)–O(2)     | 112.11(7)  | N(6)–N(5)–Ag(1)   | 116.29(13) |
|                                           | N(5)–Ag(1)–Ag(1)#1    | 88.70(5)   | C(1)–N(5)–Ag(1)   | 135.32(16) |
|                                           | N(5)–Ag(1)–Ag(1)#2    | 65.33(5)   | C(1)–N(5)–N(6)    | 107.21(18) |
|                                           | N(5)–Ag(1)–O(2)       | 96.41(7)   | N(5)–N(6)–Ag(1)#2 | 115.14(13) |
|                                           | N(5)–Ag(1)–N(4)#3     | 129.65(7)  | C(2)–N(6)–Ag(1)#2 | 135.64(16) |
|                                           | N(5)–Ag(1)–N(6)#1     | 145.84(7)  | C(2)–N(6)–N(5)    | 108.05(18) |
|                                           | N(6)#1–Ag(1)–Ag(1)#1  | 63.24(5)   | N(3)–C(1)–N(2)    | 123.5(2)   |
|                                           | N(6)#1–Ag(1)–Ag(1)#2  | 97.65(5)   | N(3)–C(1)–N(5)    | 127.6(2)   |
|                                           | N(6)#1–Ag(1)–O(2)     | 91.20(6)   | N(5)–C(1)–N(2)    | 108.8(2)   |
|                                           | N(6)#1–Ag(1)–N(4)#3   | 76.35(6)   | N(2)–C(2)–C(2)#5  | 124.5(2)   |
|                                           | N(1)–O(2)–Ag(1)       | 140.54(15) | N(6)–C(2)–N(2)    | 109.01(19) |
|                                           | O(1)–N(1)–O(2)        | 120.2(2)   | N(6)–C(2)–C(2)#5  | 126.5(3)   |
|                                           | O(1)–N(1)–O(3)        | 120.3(2)   |                   |            |

**Table S4.** Torsion Angle of H<sub>2</sub>(TABT)(NO<sub>3</sub>)<sub>2</sub> and Ag<sub>2</sub>(TABT)(NO<sub>3</sub>)<sub>2</sub>

|                                                       | Atom                     | Angle/°     | Atom                   | Angle/°     |
|-------------------------------------------------------|--------------------------|-------------|------------------------|-------------|
| H <sub>2</sub> (TABT)(NO <sub>3</sub> ) <sub>2</sub>  | N(1)–N(2)–C(2)–N(3)      | -179.7(2)   | N(4)–N(5)–C(2)–N(3)    | -2.7(3)     |
|                                                       | N(1)–N(2)–C(2)–N(5)      | -0.4(2)     | C(1)–N(1)–N(2)–C(2)    | 0.2(2)      |
|                                                       | N(2)–N(1)–C(1)–N(5)      | 0.1(2)      | C(1)–N(5)–C(2)–N(2)    | 0.4(2)      |
|                                                       | N(2)–N(1)–C(1)–C(1)#1    | 179.1(2)    | C(1)–N(5)–C(2)–N(3)    | 179.73(19)  |
|                                                       | N(4)–N(5)–C(1)–N(1)      | -177.45(18) | C(2)–N(5)–C(1)–N(1)    | -0.3(2)     |
|                                                       | N(4)–N(5)–C(1)–C(1)#1    | 3.5(4)      | C(2)–N(5)–C(1)–C(1)#1  | -179.3(2)   |
|                                                       | N(4)–N(5)–C(2)–N(2)      | 177.95(16)  |                        |             |
| Ag <sub>2</sub> (TABT)(NO <sub>3</sub> ) <sub>2</sub> | Ag(1)–O(2)–N(1)–O(1)     | 148.63(19)  | N(5)–N(6)–C(2)–N(2)    | 0.5(3)      |
|                                                       | Ag(1)–O(2)–N(1)–O(3)     | -32.5(3)    | N(5)–N(6)–C(2)–C(2)#2  | -179.3(3)   |
|                                                       | Ag(1)–N(5)–N(6)–Ag(1)#1  | -0.01(19)   | N(6)–N(5)–C(1)–N(2)    | -0.7(3)     |
|                                                       | Ag(1)–N(5)–N(6)–C(2)     | 169.61(15)  | N(6)–N(5)–C(1)–N(3)    | -178.1(2)   |
|                                                       | Ag(1)–N(5)–C(1)–N(2)     | -167.26(17) | C(1)–N(2)–N(4)–Ag(1)#3 | 169.81(17)  |
|                                                       | Ag(1)–N(5)–C(1)–N(3)     | 15.3(4)     | C(1)–N(2)–C(2)–N(6)    | -0.9(3)     |
|                                                       | Ag(1)#1–N(6)–C(2)–N(2)   | 167.04(16)  | C(1)–N(2)–C(2)–C(2)#2  | 178.9(3)    |
|                                                       | Ag(1)#1–N(6)–C(2)–C(2)#2 | -12.8(5)    | C(1)–N(5)–N(6)–Ag(1)#1 | -169.53(14) |
|                                                       | N(4)–N(2)–C(1)–N(3)      | -3.8(4)     | C(1)–N(5)–N(6)–C(2)    | 0.1(3)      |
|                                                       | N(4)–N(2)–C(1)–N(5)      | 178.6(2)    | C(2)–N(2)–N(4)–Ag(1)#3 | -13.0(3)    |
|                                                       | N(4)–N(2)–C(2)–N(6)      | -178.5(2)   | C(2)–N(2)–C(1)–N(3)    | 178.6(2)    |
|                                                       | N(4)–N(2)–C(2)–C(2)#2    | 1.3(4)      | C(2)–N(2)–C(1)–N(5)    | 1.0(3)      |

**Table S5** Hydrogen bonding parameters of H<sub>2</sub>(TABT)(NO<sub>3</sub>)<sub>2</sub> and Ag<sub>2</sub>(TABT)(NO<sub>3</sub>)<sub>2</sub>

|                                                       | Bond              | D–H···A/Å | d(H···A)/Å | d(D···A)/Å | ∠DHA/° |
|-------------------------------------------------------|-------------------|-----------|------------|------------|--------|
| H <sub>2</sub> (TABT)(NO <sub>3</sub> ) <sub>2</sub>  | N(3)–H(3A)···O(2) | 0.880     | 2.242      | 2.986      | 142.1  |
|                                                       | N(3)–H(3A)···O(3) | 0.880     | 2.342      | 3.045      | 136.9  |
|                                                       | N(3)–H(3B)···O(1) | 0.880     | 2.015      | 2.884      | 169.2  |
|                                                       | N(2)–H(2)···O(1)  | 0.880     | 1.843      | 2.718      | 172.9  |
|                                                       | N(4)–H(4A)···O(3) | 0.821     | 2.213      | 3.020      | 167.8  |
|                                                       | N(4)–H(4B)···O(2) | 0.881     | 2.334      | 3.049      | 138.4  |
|                                                       | N(4)–H(4A)···N(1) | 0.821     | 2.756      | 3.016      | 100.6  |
|                                                       | N(4)–H(4B)···N(1) | 0.881     | 2.737      | 3.016      | 99.94  |
| Ag <sub>2</sub> (TABT)(NO <sub>3</sub> ) <sub>2</sub> | N(3)–H(3A)···O(3) | 0.880     | 2.085      | 2.875      | 148.9  |
|                                                       | N(4)–H(4A)···O(2) | 0.910     | 2.150      | 2.796      | 127.2  |
|                                                       | N(4)–H(4B)···O(3) | 0.910     | 2.017      | 2.870      | 155.5  |
|                                                       | N(4)–H(4A)···O(1) | 0.910     | 2.757      | 2.881      | 88.48  |
|                                                       | N(4)–H(4B)···O(1) | 0.910     | 2.518      | 2.881      | 104.3  |

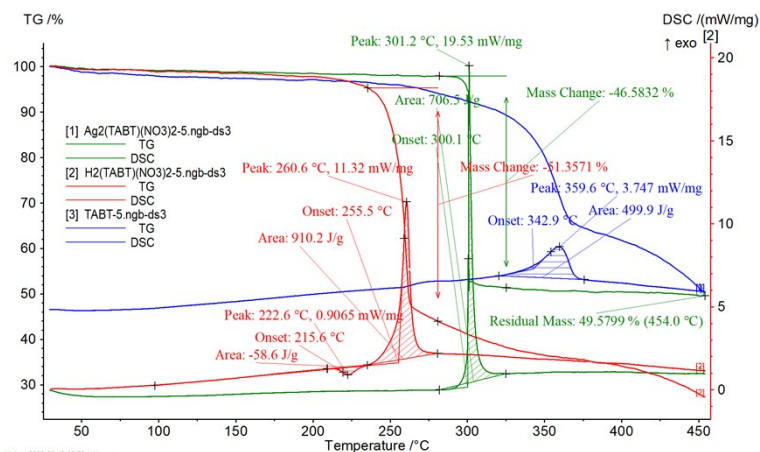

Fig. S3 DSC of TABT and its salts at the heating rate of  $5^\circ\text{C min}^{-1}$

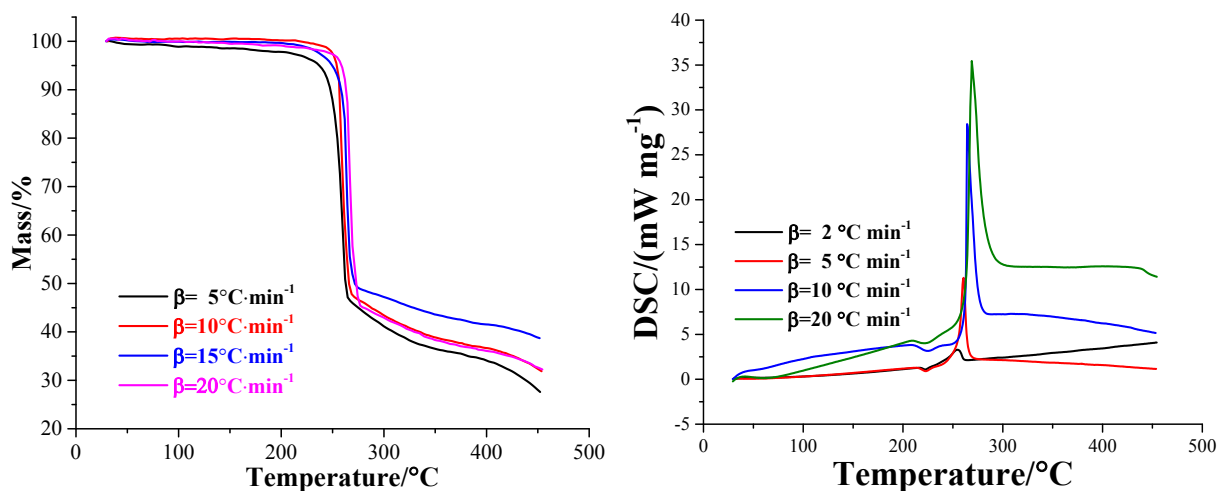

Fig. S4 TG-DSC curves of  $\text{H}_2(\text{TABT})(\text{NO}_3)_2$  under the different heating rates

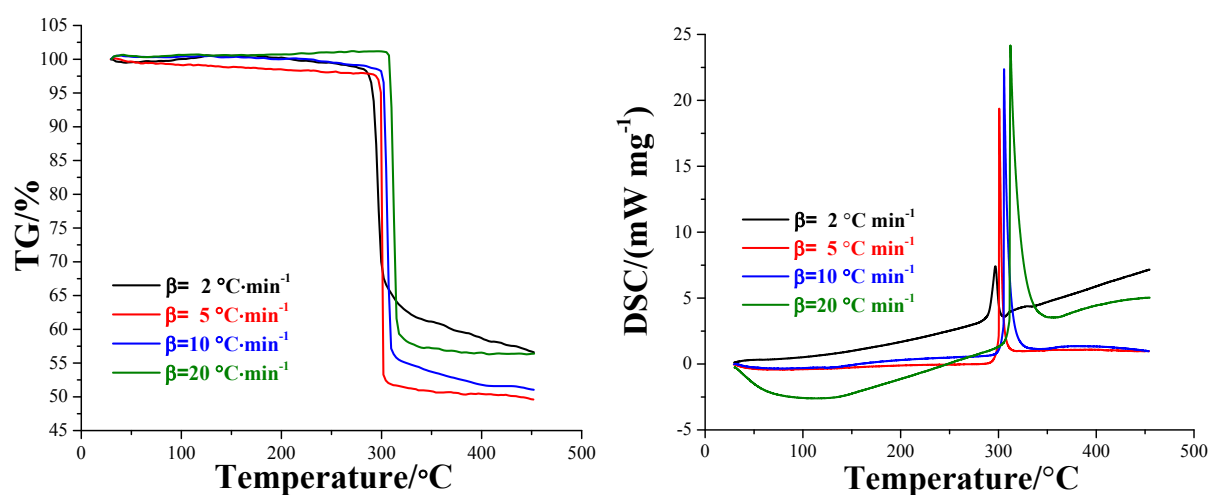

Fig. S5 TG-DSC curves of  $\text{Ag}_2(\text{TABT})(\text{NO}_3)_2$  under the different heating rates

**Table S6** Thermo-kinetic parameters for  $\text{H}_2(\text{TABT})(\text{NO}_3)_2$  and  $[\text{Ag}_2(\text{TABT})(\text{NO}_3)_2]_n$ 

| $\beta$  | $\text{C}_4\text{H}_{10}\text{N}_{12}\text{O}_6$ |       | $\text{C}_4\text{H}_8\text{N}_{12}\text{O}_6\text{Ag}_2$ |       |
|----------|--------------------------------------------------|-------|----------------------------------------------------------|-------|
|          | $T_0$                                            | $T_p$ | $T_0$                                                    | $T_p$ |
| 2        | 245.5                                            | 253.8 | 290.8                                                    | 296.5 |
| 5        | 256.3                                            | 260.6 | 299.4                                                    | 301.2 |
| 10       | 259.0                                            | 264.5 | 304.9                                                    | 306.2 |
| 20       | 264.0                                            | 269.0 | 311.1                                                    | 312.2 |
| $E_k$    | 368.6                                            |       | 392.7                                                    |       |
| $r_k$    | 0.9992                                           |       | 0.9931                                                   |       |
| $A$      | $3.295 \times 10^{35}$                           |       | $1.140 \times 10^{35}$                                   |       |
| $E_0$    | 359.0                                            |       | 382.6                                                    |       |
| $r_0$    | 0.9992                                           |       | 0.9935                                                   |       |
| $E_a$    | 363.8                                            |       | 387.6                                                    |       |
| $T_{e0}$ | 232.4                                            |       | 281.8                                                    |       |
| $T_b$    | 238.5                                            |       | 288.7                                                    |       |

**Table S7** Calculated parameters used in the isomeric reactions.

|                   | $H_0/\text{Hartree}$ | $\Delta H_f^\theta(\text{gas})/$<br>(kJ mol $^{-1}$ ) | $\Delta H_f^\theta(\text{gas})/$<br>(kcal mol $^{-1}$ ) | $A/(\text{\AA}^2)$ | $\nu$  | $\sigma_{tot}^2$ | $\Delta H_{f,sub}^\theta/$<br>(kcal mol $^{-1}$ ) | $\Delta H_{f,sub}^\theta/$<br>(kJ mol $^{-1}$ ) | $\Delta H_{f,solid}^\theta/$<br>(kJ mol $^{-1}$ ) | $\Delta H_{f,solid}^\theta/$<br>(kcal mol $^{-1}$ ) |
|-------------------|----------------------|-------------------------------------------------------|---------------------------------------------------------|--------------------|--------|------------------|---------------------------------------------------|-------------------------------------------------|---------------------------------------------------|-----------------------------------------------------|
| TABT              | -700.5564            | 472.0 <sup>a</sup>                                    | 112.8                                                   | -                  | -      | -                | -                                                 | -                                               | -                                                 | -                                                   |
| HNO <sub>3</sub>  | -279.2489            | -134.41 <sup>b</sup>                                  | -32.11                                                  | -                  | -      | -                | -                                                 | -                                               | -                                                 | -                                                   |
| AgNO <sub>3</sub> | -5455.0253           | 284.9 <sup>b</sup>                                    | 68.06                                                   | -                  | -      | -                | -                                                 | -                                               | -                                                 | -                                                   |
| <b>1</b>          | -1259.1179           | <b>20.56</b>                                          | 4.912                                                   | 306.0              | 0.2329 | 439.1            | 59.00                                             | 247.0                                           | <b>-226.4</b>                                     | <b>-54.09</b>                                       |
| <b>2</b>          | -                    | <b>-179.7</b>                                         | -42.93                                                  | 332.5              | 0.2449 | 310.9            | 62.59                                             | 262.0                                           | <b>-441.7</b>                                     | <b>-105.5</b>                                       |
|                   | 11610.7603           |                                                       |                                                         |                    |        |                  |                                                   |                                                 |                                                   |                                                     |

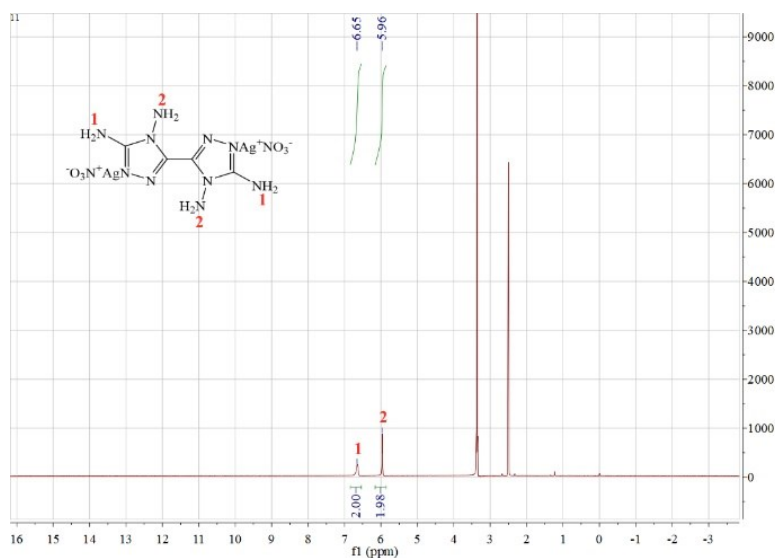**Fig. S6**  $^1\text{H}$  of  $\{\text{Ag}_2(\text{TABT})(\text{NO}_3)_2\}_n$
